# Supplementary material for: Colorectal Cancer Early Detection in Stool Samples Tracing CpG Islands Methylation Alterations Affecting Gene Expression
Source: PubMed Central journal article supplement (PMC7349989; doi:10.3390/ijms21124494), 2020-06-24
Supplement: ijms-21-04494-s001.pdf [file ijms-21-04494-s001.pdf]

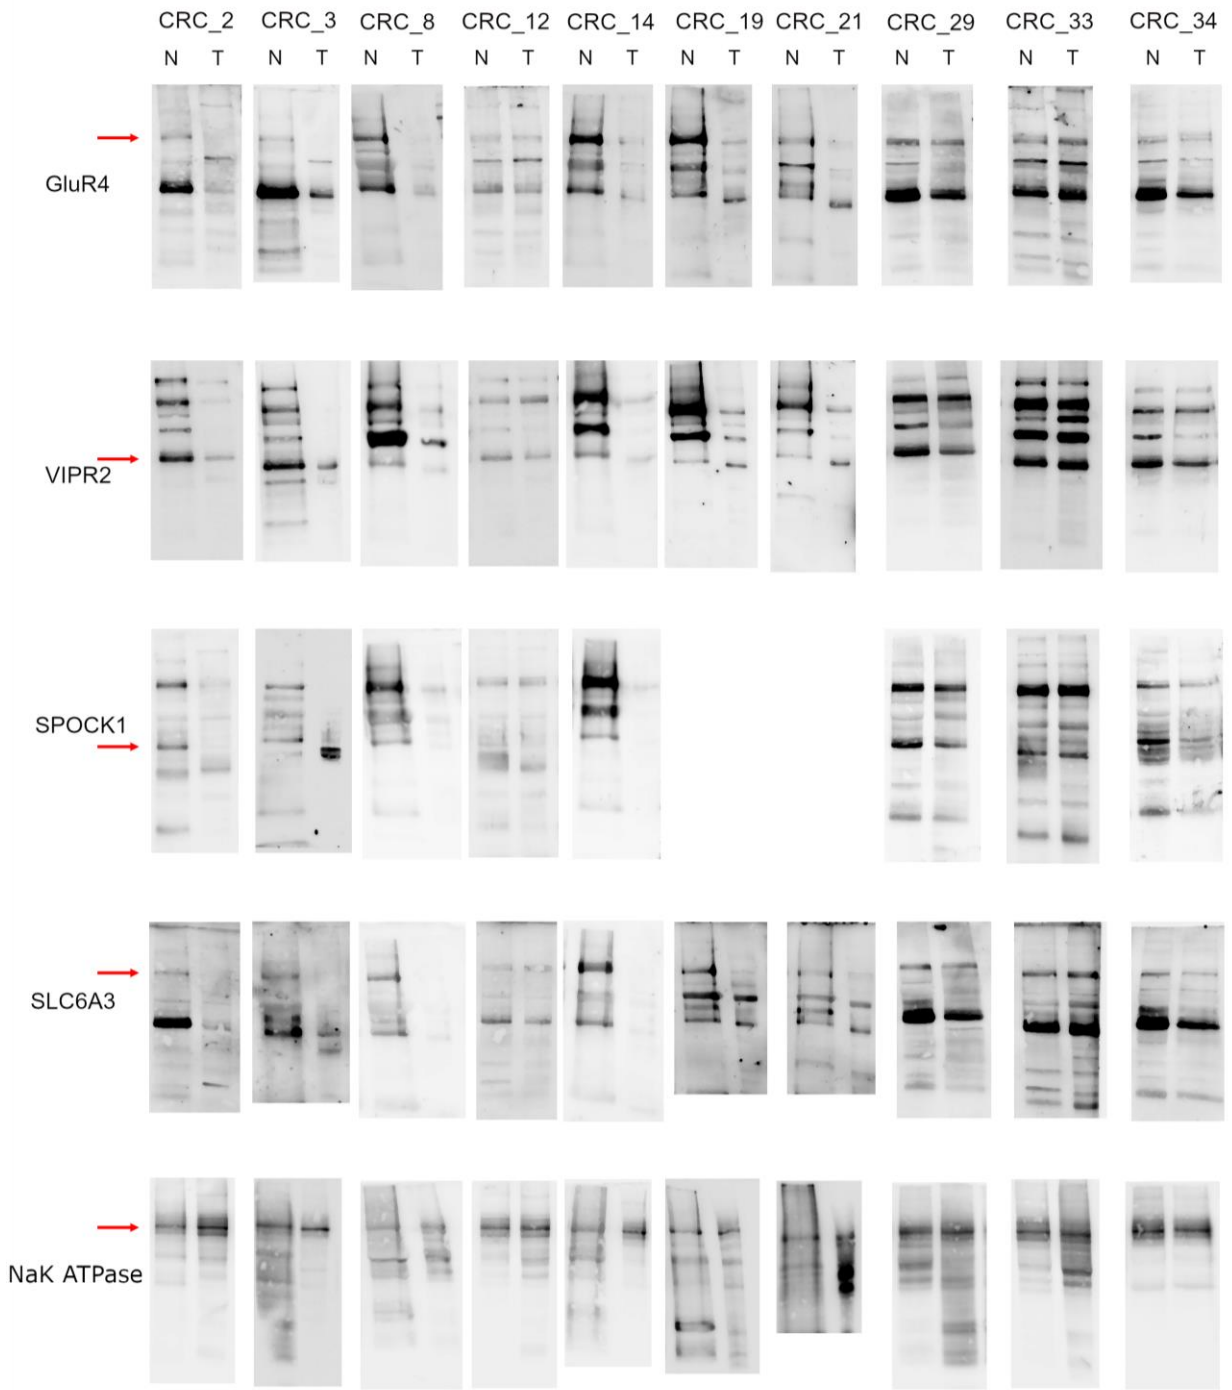

**Figure S1.** Full lanes of Western blot study. Red arrows indicate molecular weight.
